# Supplementary material for: Estrogen-Related Receptor γ Induces Angiogenesis and Extracellular Matrix Degradation of Temporomandibular Joint Osteoarthritis in Rats
Source: PubMed Central journal article supplement (PMC6851845; doi:10.3389/fphar.2019.01290), 2019-11-06
Supplement: Table_1.pdf [file Table_1.pdf]

## Supplementary Table S1: Primer sequences for RT-qPCR

| Gene           | Forward(5'-3')       | Reverse(5'-3')       |
|----------------|----------------------|----------------------|
| ERR $\gamma$   | GCGTAGAATAGATGCTGAG  | CCAATGATAACCACCAACT  |
| ERR $\alpha$   | CATCTGCTGGTGGTTGAA   | AGAGTGACAGTGAGGAGAA  |
| HIF1 $\alpha$  | CTCCATTACCTGCCTCTG   | ATTCTTCGCTTCTGTGTCT  |
| MMP13          | ATGTGGAGTGCCTGATGTG  | AAGCGTGTGCCAGAAGAC   |
| VEGFA          | CCGGTTTAAATCCTGGAGCG | TTTAACTCAAGCTGCCTCGC |
| MMP9           | ACTGCTGGTCCTTCTGAG   | ATTGGCTTCCTCCGTGAT   |
| COL2           | AAGAGCAAGGAGAAGAAG   | TTACAGTGGTAGGTGATG   |
| AGG            | GCAGCACAGACACTTCAGGA | CCCACCTTCTACAGGCAAGC |
| $\beta$ -actin | CGGTCAGGTCATCACTAT   | TGTTGGCATAGAGGTCTT   |
| GADPH          | ATGATTCTACCCACGGCAAG | CTGGAAGATGGTGATGGGTT |
