# Supplementary material for: Estrogen-Related Receptor γ Induces Angiogenesis and Extracellular Matrix Degradation of Temporomandibular Joint Osteoarthritis in Rats
Source: PubMed Central journal article supplement (PMC6851845; doi:10.3389/fphar.2019.01290), 2019-11-06
Supplement: Table_2.pdf [file Table_2.pdf]

## Supplementary Table S2: Sequences for siRNA

| Gene                 | 5'-3'               |
|----------------------|---------------------|
| ERK-siRNA            | CCTCAAAGCAATAGCTCTT |
| ERR $\gamma$ -siRNA  | GAAAGAGCTTCTGCACAAT |
| ERR $\alpha$ -siRNA  | AGCGCAAGGGCCTCAATTA |
| HIF1 $\alpha$ -siRNA | GCAAGGCCTTACATGTAA  |
