# Supplementary material for: Estrogen-Related Receptor γ Induces Angiogenesis and Extracellular Matrix Degradation of Temporomandibular Joint Osteoarthritis in Rats
Source: PubMed Central journal article supplement (PMC6851845; doi:10.3389/fphar.2019.01290), 2019-11-06
Supplement: Table_3.pdf [file Table_3.pdf]

Supplementary Table S3: Primer sequences and conditions for ChIP assay

| Target  | Strand  | Primer sequences             | Size<br>(bp) | AT<br>(°C) | Origin |
|---------|---------|------------------------------|--------------|------------|--------|
| MMP9#1  | Forward | 5' CACCATGCGTACCCTCCTTCC 3'  | 135          | 60         | Rat    |
|         | Reverse | 5' ATGCCCTGCCCACAGTCCC 3'    |              |            |        |
| MMP9#2  | Forward | 5' GTGGACCCAGGACTGCAAT 3'    | 67           | 60         | Rat    |
|         | Reverse | 5' GCTCCCCGGCTTCTCTTATAT 3'  |              |            |        |
| MMP9#3  | Forward | 5' CGATGTTAGCCAGCCTGAGAA 3'  | 132          | 60         | Rat    |
|         | Reverse | 5' GCTCTTTGAAGCAGGATTTGG 3'  |              |            |        |
| VEGFA#1 | Forward | 5' AGCCTTACCTCTACTCCCATCC 3' | 91           | 60         | Rat    |
|         | Reverse | 5' TTCAAACCTACCCTAGCATTCA 3' |              |            |        |
| VEGFA#2 | Forward | 5' CCTCCGGGCCACTGACTAA 3'    | 74           | 60         | Rat    |
|         | Reverse | 5' CTCTGGAGAGGATATGGCATCA 3' |              |            |        |
| VEGFA#3 | Forward | 5' GATGGAGATGGTGGAGTAACCT 3' | 129          | 60         | Rat    |
|         | Reverse | 5' GCTCTGATACCTGTGGGAAGA 3'  |              |            |        |
